# Supplementary material
Source: HighWire-hosted journal article supplement (http://molpharm.aspetjournals.org/highwire/filestream/76528/field_highwire_adjunct_files/1/online_Figure1S.pdf)

Figure 1S

**A**

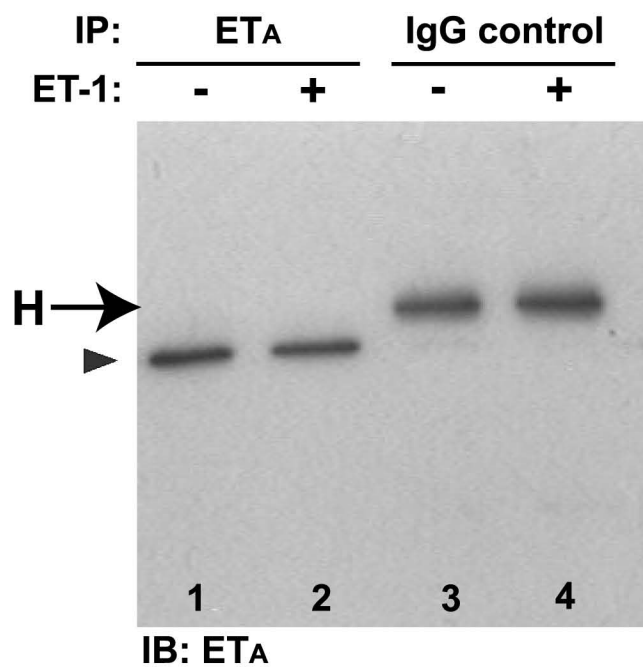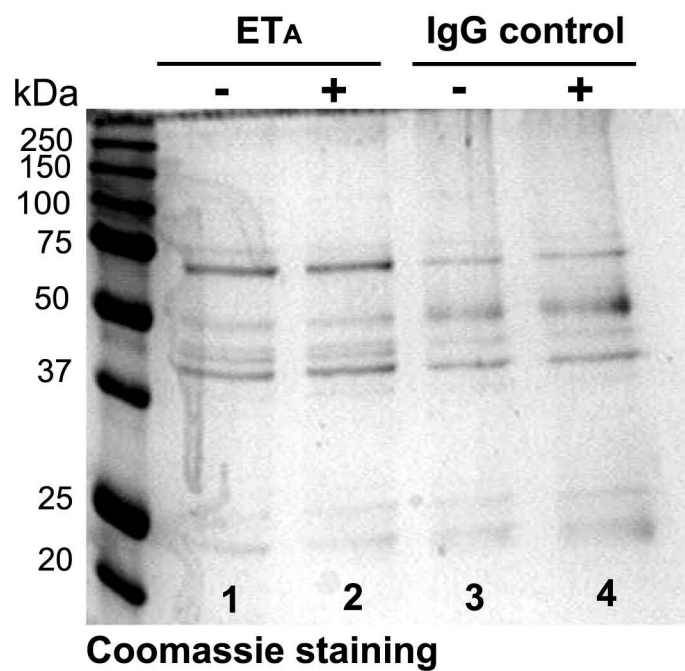

**B**

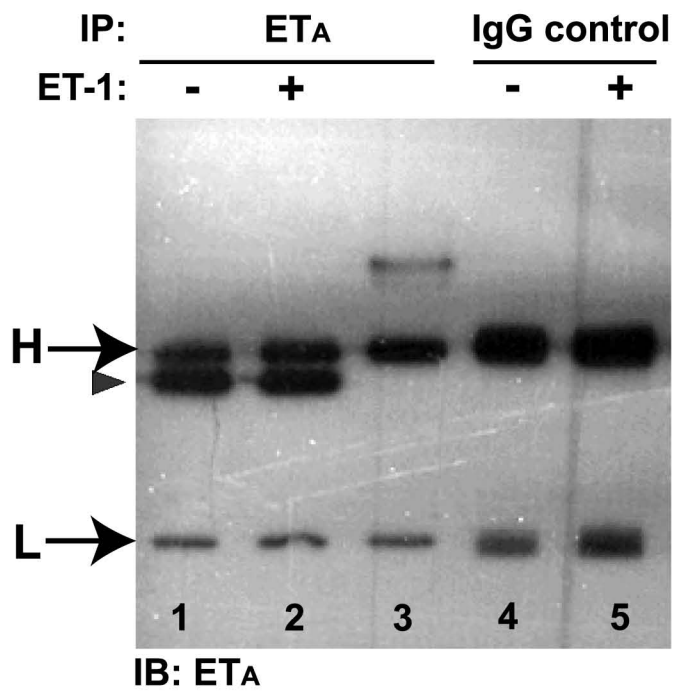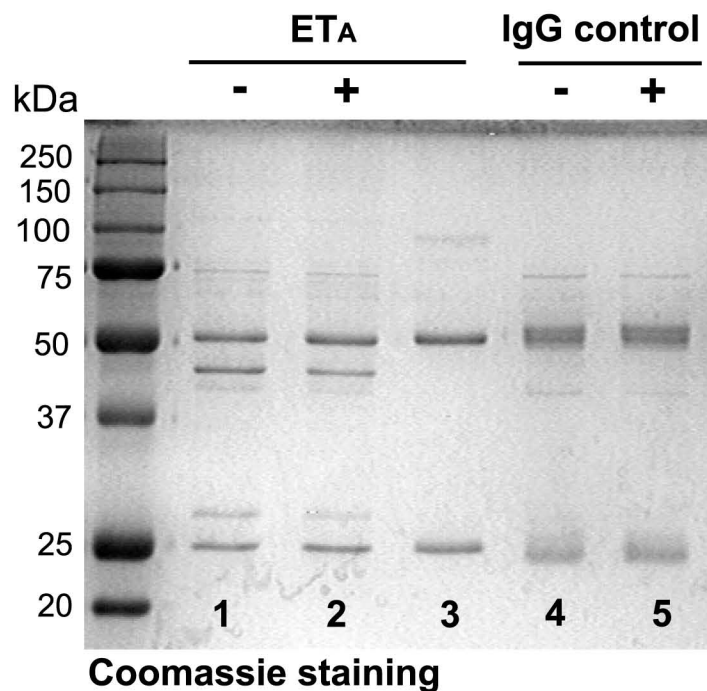

Supplement: online_Figure1S.pdf [file online_Figure1S.pdf]
